# Supplementary material for: Strategies in supporting inclusive education for autistic students—A systematic review of qualitative research results
Source: PubMed Central journal article supplement (PMC9620685; doi:10.1177/23969415221123429), 2022-09-21
Supplement: sj-pdf-1-dli-10.1177_23969415221123429.pdf [file sj-pdf-1-dli-10.1177_23969415221123429.pdf]

## Supplementary material Search Strategy

### Full Search Strategy

#### 1. ERIC (ProQuest)

|                                                                                                                                                                                                                                                                                                                                                                                                                                                                                                                                                                                                                                                                                                                                                                                                                                                                                                                                                                                                                                                                                                                                                                                                                                                                                                                                                                                                                                                                                                                                                                                                                                                                                                                                                                                                                                                                                                                                                                                                                                                                                                                                                                                                                                                                                                                                                                                                                                                                                                                     |                                                                                                                                                                                                                                                                                                                                        |
|---------------------------------------------------------------------------------------------------------------------------------------------------------------------------------------------------------------------------------------------------------------------------------------------------------------------------------------------------------------------------------------------------------------------------------------------------------------------------------------------------------------------------------------------------------------------------------------------------------------------------------------------------------------------------------------------------------------------------------------------------------------------------------------------------------------------------------------------------------------------------------------------------------------------------------------------------------------------------------------------------------------------------------------------------------------------------------------------------------------------------------------------------------------------------------------------------------------------------------------------------------------------------------------------------------------------------------------------------------------------------------------------------------------------------------------------------------------------------------------------------------------------------------------------------------------------------------------------------------------------------------------------------------------------------------------------------------------------------------------------------------------------------------------------------------------------------------------------------------------------------------------------------------------------------------------------------------------------------------------------------------------------------------------------------------------------------------------------------------------------------------------------------------------------------------------------------------------------------------------------------------------------------------------------------------------------------------------------------------------------------------------------------------------------------------------------------------------------------------------------------------------------|----------------------------------------------------------------------------------------------------------------------------------------------------------------------------------------------------------------------------------------------------------------------------------------------------------------------------------------|
| <p>Interface: ProQuest<br/>Date of Search: 26 November 2018<br/>Number of hits: 3,093</p>                                                                                                                                                                                                                                                                                                                                                                                                                                                                                                                                                                                                                                                                                                                                                                                                                                                                                                                                                                                                                                                                                                                                                                                                                                                                                                                                                                                                                                                                                                                                                                                                                                                                                                                                                                                                                                                                                                                                                                                                                                                                                                                                                                                                                                                                                                                                                                                                                           | <p>Field labels</p> <ul style="list-style-type: none"> <li>• MAINSUBJECT.EXACT.EXPLODE = exploded subject heading</li> <li>• MAINSUBJECT.EXACT non exploded subject heading</li> <li>• TI,AB = title, abstract</li> <li>• N/x = within x words, regardless of order</li> <li>• * = truncation of word for alternate endings</li> </ul> |
| <p>(MAINSUBJECT.EXACT("Pervasive Developmental Disorders") OR TI,AB(autis* OR asperger* OR "childhood disintegrative" OR "pervasive development*" OR rett*))<br/>AND<br/>(MAINSUBJECT.EXACT.EXPLODE("School activities" OR "Classes (Groups of Students)" OR "Educational Environment" OR "Educational Facilities" OR "Educational Methods" OR "Educational Practices" OR "Teacher Education" OR "Professional Development") OR MAINSUBJECT.EXACT("Class Size" OR "Educational Facilities Design" OR "Educational Strategies" OR "Instructional Design") OR TI,AB(((education* OR environment* OR learning OR school OR teaching OR instructional OR teacher*) N/3 (adaption* OR activit* OR facilit* OR method* OR design OR support* OR practice* OR provision* OR strateg* OR technique* OR intervention* or program*)) OR (environment* N/3 ("autism friendly" OR built OR condition* OR adaption* OR education* OR enabling OR learning OR support*)) OR "school class*" OR "class size*" OR classroom* OR "curricul* adaptation*" OR "group activit*" OR "group size*" OR grouping OR "teaching assistant*" OR "teacher aides" OR "satellite class*" OR "school schedul*" OR schoolyard* OR "school yard*" OR "evidence based" OR ((teacher* OR staff OR paraprofessional OR professional OR faculty OR staff) N/0 (development OR education OR training)) OR (autis* OR asperger* OR "childhood disintegrative" OR "pervasive development*")N/2 (awareness OR knowledge)))<br/>AND<br/>(((MAINSUBJECT.EXACT.EXPLODE("Children" OR "Adolescents") OR MAINSUBJECT.EXACT("Early Adolescents" OR "Preadolescents") OR TI,AB(child* OR adolescen* OR preadolescenc* OR teen*)) AND (MAINSUBJECT.EXACT.EXPLODE("Education" OR "Schools") OR TI,AB(school* OR classroom* OR student*)) OR (MAINSUBJECT.EXACT("Mainstreaming" OR "Inclusion" OR "Middle School Students" OR "Middle Schools" OR "Elementary School Students" OR "Elementary Schools" OR "Compulsory Education") OR MAINSUBJECT.EXACT.EXPLODE("Secondary School Students" OR "Secondary Schools" OR "Elementary Secondary Education") OR TI,AB((elementary OR compulsory OR middle OR primary OR secondary) N/2 (school* OR education OR level)) OR ((includi* OR integrat* OR general OR regular) N/2 (adolescenc* OR child* OR education OR school* OR student* OR pedagogy OR program OR provision* OR setting*)) OR college* OR "high school*" OR "public education" OR "public school" OR pupil* OR mainstream* OR "naturalistic setting*"))</p> |                                                                                                                                                                                                                                                                                                                                        |

#### 2. Medline

| <p>Interface: Ovid<br/>Date of Search: 3 December 2018<br/>Number of hits: 1,046<br/>Comment: In Ovid, two or more words are automatically searched as phrases; i.e. no quotation marks are needed</p>                                                                                                                                                                                                                                                                                                                                                           | <p>Field labels</p> <ul style="list-style-type: none"> <li>• exp/ = exploded MeSH term</li> <li>• / = non exploded MeSH term</li> <li>• .ti,ab,kf. = title, abstract and author keywords</li> <li>• adjx = within x words, regardless of order</li> <li>• * = truncation of word for alternate endings</li> </ul> |          |         |   |                                             |       |   |                |      |   |                                                                                                 |       |   |        |       |   |                                    |       |  |
|------------------------------------------------------------------------------------------------------------------------------------------------------------------------------------------------------------------------------------------------------------------------------------------------------------------------------------------------------------------------------------------------------------------------------------------------------------------------------------------------------------------------------------------------------------------|-------------------------------------------------------------------------------------------------------------------------------------------------------------------------------------------------------------------------------------------------------------------------------------------------------------------|----------|---------|---|---------------------------------------------|-------|---|----------------|------|---|-------------------------------------------------------------------------------------------------|-------|---|--------|-------|---|------------------------------------|-------|--|
| <table border="1"> <thead> <tr> <th>#</th> <th>Searches</th> <th>Results</th> </tr> </thead> <tbody> <tr> <td>1</td> <td>exp Child Development Disorders, Pervasive/</td> <td>30182</td> </tr> <tr> <td>2</td> <td>Rett Syndrome/</td> <td>2371</td> </tr> <tr> <td>3</td> <td>(autis* or asperger* or childhood disintegrative or pervasive developmental or rett*).ti,ab,kf.</td> <td>45992</td> </tr> <tr> <td>4</td> <td>or/1-3</td> <td>49213</td> </tr> <tr> <td>5</td> <td>"Physical Education and Training"/</td> <td>13169</td> </tr> </tbody> </table> | #                                                                                                                                                                                                                                                                                                                 | Searches | Results | 1 | exp Child Development Disorders, Pervasive/ | 30182 | 2 | Rett Syndrome/ | 2371 | 3 | (autis* or asperger* or childhood disintegrative or pervasive developmental or rett*).ti,ab,kf. | 45992 | 4 | or/1-3 | 49213 | 5 | "Physical Education and Training"/ | 13169 |  |
| #                                                                                                                                                                                                                                                                                                                                                                                                                                                                                                                                                                | Searches                                                                                                                                                                                                                                                                                                          | Results  |         |   |                                             |       |   |                |      |   |                                                                                                 |       |   |        |       |   |                                    |       |  |
| 1                                                                                                                                                                                                                                                                                                                                                                                                                                                                                                                                                                | exp Child Development Disorders, Pervasive/                                                                                                                                                                                                                                                                       | 30182    |         |   |                                             |       |   |                |      |   |                                                                                                 |       |   |        |       |   |                                    |       |  |
| 2                                                                                                                                                                                                                                                                                                                                                                                                                                                                                                                                                                | Rett Syndrome/                                                                                                                                                                                                                                                                                                    | 2371     |         |   |                                             |       |   |                |      |   |                                                                                                 |       |   |        |       |   |                                    |       |  |
| 3                                                                                                                                                                                                                                                                                                                                                                                                                                                                                                                                                                | (autis* or asperger* or childhood disintegrative or pervasive developmental or rett*).ti,ab,kf.                                                                                                                                                                                                                   | 45992    |         |   |                                             |       |   |                |      |   |                                                                                                 |       |   |        |       |   |                                    |       |  |
| 4                                                                                                                                                                                                                                                                                                                                                                                                                                                                                                                                                                | or/1-3                                                                                                                                                                                                                                                                                                            | 49213    |         |   |                                             |       |   |                |      |   |                                                                                                 |       |   |        |       |   |                                    |       |  |
| 5                                                                                                                                                                                                                                                                                                                                                                                                                                                                                                                                                                | "Physical Education and Training"/                                                                                                                                                                                                                                                                                | 13169    |         |   |                                             |       |   |                |      |   |                                                                                                 |       |   |        |       |   |                                    |       |  |

|    |                                                                                                                                                                                                                                                                     |         |
|----|---------------------------------------------------------------------------------------------------------------------------------------------------------------------------------------------------------------------------------------------------------------------|---------|
| 6  | Teacher Training/                                                                                                                                                                                                                                                   | 141     |
| 7  | Schools/                                                                                                                                                                                                                                                            | 33727   |
| 8  | exp Teaching/                                                                                                                                                                                                                                                       | 79944   |
| 9  | ((education* or environment* or learning or school or teaching or instructional or teacher*) adj3 (adaption* or activit* or facilit* or method* or design or support* or practice* or provision* or strateg* or technique* or intervention* or program*)).ti,ab,kf. | 196713  |
| 10 | (environment* adj3 (autism friendly or built or condition* or adaption* or education* or enabling or learning or support*)).ti,ab,kf.                                                                                                                               | 58050   |
| 11 | ((teacher* or staff or paraprofessional* or professional* or peer or faculty or staff) adj1 (development or education or training)).ti,ab,kf.                                                                                                                       | 26454   |
| 12 | ((autis* or asperger* or childhood disintegrative or pervasive developmental) adj2 (awareness or knowledge)).ti,ab,kf.                                                                                                                                              | 182     |
| 13 | (school class* or class size* or classroom* or curricul* adaptation* or group activit* or group size* or grouping or teaching assistant* or teacher aides or satellite class* or school schedul* or schoolyard* or school yard* or evidence based).ti,ab,kf.        | 136788  |
| 14 | or/5-13                                                                                                                                                                                                                                                             | 476630  |
| 15 | Child/                                                                                                                                                                                                                                                              | 1587949 |
| 16 | Adolescent/                                                                                                                                                                                                                                                         | 1897588 |
| 17 | (child* or adolescen* or preadolescen* or teen* or youth).ti,ab,kf.                                                                                                                                                                                                 | 1492143 |
| 18 | or/15-17                                                                                                                                                                                                                                                            | 3172688 |
| 19 | Schools/                                                                                                                                                                                                                                                            | 33727   |
| 20 | (school* or classroom* or student*).ti,ab,kf.                                                                                                                                                                                                                       | 444486  |
| 21 | or/19-20                                                                                                                                                                                                                                                            | 448207  |
| 22 | 18 and 21                                                                                                                                                                                                                                                           | 205404  |
| 23 | "Mainstreaming (Education)"/                                                                                                                                                                                                                                        | 1028    |
| 24 | ((elementary or compulsory or middle or primary or secondary) adj2 (school* or education or level)).ti,ab,kf.                                                                                                                                                       | 45147   |
| 25 | ((includi* or integrat* or general or regular) adj2 (adolescen* or child* or education or school* or student* or pedagogy or program or provision* or setting*)).ti,ab,kf.                                                                                          | 24477   |
| 26 | (college* or high school* or public education or public school or pupil* or mainstream* or naturalistic setting*).ti,ab,kf.                                                                                                                                         | 174028  |
| 27 | or/22-26                                                                                                                                                                                                                                                            | 372707  |
| 28 | 4 and 14 and 27                                                                                                                                                                                                                                                     | 1046    |

### 3. Web of Science Core Collection

| Interface: Clarivate Analytics<br>Date of Search: 26 November 2018<br>Number of hits: 4,044 |         | Field labels <ul style="list-style-type: none"> <li>• TS/Topic = title, abstract, author keywords and Keywords Plus</li> <li>• NEAR/x = within x words, regardless of order</li> <li>• * = truncation of word for alternate endings</li> </ul>                                                                                                  |
|---------------------------------------------------------------------------------------------|---------|-------------------------------------------------------------------------------------------------------------------------------------------------------------------------------------------------------------------------------------------------------------------------------------------------------------------------------------------------|
| Set                                                                                         | Results |                                                                                                                                                                                                                                                                                                                                                 |
| # 4                                                                                         | 4,044   | #3 AND #2 AND #1<br>Indexes=SCI-EXPANDED, SSCI, A&HCI, CPCI-S, CPCI-SSH, ESCI Timespan=1945-2018                                                                                                                                                                                                                                                |
| # 3                                                                                         | 733,836 | <b>TOPIC:</b> (((child* OR adolescen* OR preadolescen* OR teen* OR youth) AND (school* OR classroom* OR student*))) OR <b>TOPIC:</b> (((elementary OR compulsory OR middle OR primary OR secondary) NEAR/2 (school* OR education OR level))) OR <b>TOPIC:</b> (((includi* OR integrat* OR general OR regular OR ordinary) NEAR/2 (adolescen* OR |

|     |           |                                                                                                                                                                                                                                                                                                                                                                                                                                                                                                                                                                                                                                                                                                                                                                                                                                                                                                                                                                                                                                                                                   |
|-----|-----------|-----------------------------------------------------------------------------------------------------------------------------------------------------------------------------------------------------------------------------------------------------------------------------------------------------------------------------------------------------------------------------------------------------------------------------------------------------------------------------------------------------------------------------------------------------------------------------------------------------------------------------------------------------------------------------------------------------------------------------------------------------------------------------------------------------------------------------------------------------------------------------------------------------------------------------------------------------------------------------------------------------------------------------------------------------------------------------------|
|     |           | child* OR education OR school* OR student* OR pedagogy OR program OR provision* OR setting*)) OR TOPIC: ((college* OR "high school*" OR mainstream* OR "public education" OR "public school" OR pupil* OR "naturalistic setting*")) Indexes=SCI-EXPANDED, SSCI, A&HCI, CPCI-S, CPCI-SSH, ESCI Timespan=1945-2018                                                                                                                                                                                                                                                                                                                                                                                                                                                                                                                                                                                                                                                                                                                                                                  |
| # 2 | 6,043,750 | <b>TOPIC:</b> (((education* OR environment* OR learning OR school OR teaching OR instructional OR teacher*) NEAR/3 (adaption* OR activit* OR facilit* OR method* OR design OR support* OR practice* OR provision* OR strateg* OR technique* OR intervention* or program*))) OR <b>TOPIC:</b> ((environment* NEAR/3 ("autism friendly" OR built OR condition* OR adaption* OR education* OR enabling OR learning OR support*)) OR <b>TOPIC:</b> ((classes OR "class size*" OR classroom* OR "curricul* adaptation*" OR "group activit*" OR "group size*" OR grouping OR "teaching assistant*" OR "teacher aides" OR "satellite class*" OR "school schedul*" OR schoolyard* OR "school yard*" OR "evidence based")) OR <b>TOPIC:</b> (((teacher* OR staff OR paraprofessional OR professional OR faculty OR staff) NEAR/0 (development OR education OR training))) OR <b>TOPIC:</b> (((autis* OR asperger* OR "childhood disintegrative" OR "pervasive development*")NEAR/2 (awareness OR knowledge))) Indexes=SCI-EXPANDED, SSCI, A&HCI, CPCI-S, CPCI-SSH, ESCI Timespan=1945-2018 |
| # 1 | 72,163    | <b>TOPIC:</b> ((autis* OR asperger* OR "childhood disintegrative" OR "pervasive development*" OR rett*)) Indexes=SCI-EXPANDED, SSCI, A&HCI, CPCI-S, CPCI-SSH, ESCI Timespan=1945-2018                                                                                                                                                                                                                                                                                                                                                                                                                                                                                                                                                                                                                                                                                                                                                                                                                                                                                             |

## 5. Psycinfo

|                                                                                                                                                                                              |                                                                                                                                                                                                                                                                    |                                                                                                                                                                                                                                                                                                                        |
|----------------------------------------------------------------------------------------------------------------------------------------------------------------------------------------------|--------------------------------------------------------------------------------------------------------------------------------------------------------------------------------------------------------------------------------------------------------------------|------------------------------------------------------------------------------------------------------------------------------------------------------------------------------------------------------------------------------------------------------------------------------------------------------------------------|
| Interface: Ovid<br>Date of Search: 3 December 2018<br>Number of hits: 2,680<br>Comment: In Ovid, two or more words are automatically searched as phrases; i.e. no quotation marks are needed |                                                                                                                                                                                                                                                                    | Field labels <ul style="list-style-type: none"> <li>• exp/ = exploded controlled term</li> <li>• / = non exploded controlled term</li> <li>• .ti,ab,id. = title, abstract and author keywords</li> <li>• adjx = within x words, regardless of order</li> <li>• * = truncation of word for alternate endings</li> </ul> |
| #                                                                                                                                                                                            | Searches                                                                                                                                                                                                                                                           | Results                                                                                                                                                                                                                                                                                                                |
| 1                                                                                                                                                                                            | exp autism spectrum disorders/                                                                                                                                                                                                                                     | 39217                                                                                                                                                                                                                                                                                                                  |
| 2                                                                                                                                                                                            | exp Rett Syndrome/                                                                                                                                                                                                                                                 | 825                                                                                                                                                                                                                                                                                                                    |
| 3                                                                                                                                                                                            | (autis* or asperger* or childhood disintegrative or pervasive developmental or rett*).ti,ab,id.                                                                                                                                                                    | 49903                                                                                                                                                                                                                                                                                                                  |
| 4                                                                                                                                                                                            | or/1-3                                                                                                                                                                                                                                                             | 50275                                                                                                                                                                                                                                                                                                                  |
| 5                                                                                                                                                                                            | learning environment/                                                                                                                                                                                                                                              | 9741                                                                                                                                                                                                                                                                                                                   |
| 6                                                                                                                                                                                            | academic environment/                                                                                                                                                                                                                                              | 2166                                                                                                                                                                                                                                                                                                                   |
| 7                                                                                                                                                                                            | classroom environment/                                                                                                                                                                                                                                             | 8298                                                                                                                                                                                                                                                                                                                   |
| 8                                                                                                                                                                                            | classrooms/                                                                                                                                                                                                                                                        | 15026                                                                                                                                                                                                                                                                                                                  |
| 9                                                                                                                                                                                            | school environment/                                                                                                                                                                                                                                                | 11874                                                                                                                                                                                                                                                                                                                  |
| 10                                                                                                                                                                                           | exp classroom management/                                                                                                                                                                                                                                          | 3227                                                                                                                                                                                                                                                                                                                   |
| 11                                                                                                                                                                                           | exp school facilities/                                                                                                                                                                                                                                             | 19244                                                                                                                                                                                                                                                                                                                  |
| 12                                                                                                                                                                                           | exp teaching/                                                                                                                                                                                                                                                      | 113298                                                                                                                                                                                                                                                                                                                 |
| 13                                                                                                                                                                                           | exp teacher education/                                                                                                                                                                                                                                             | 15799                                                                                                                                                                                                                                                                                                                  |
| 14                                                                                                                                                                                           | paraprofessional education/                                                                                                                                                                                                                                        | 649                                                                                                                                                                                                                                                                                                                    |
| 15                                                                                                                                                                                           | class size/                                                                                                                                                                                                                                                        | 288                                                                                                                                                                                                                                                                                                                    |
| 16                                                                                                                                                                                           | ((education* or environment* or learning or school or teaching or instructional or teacher*) adj3 (adaption* or activit* or facilit* or method* or design or support* or practice* or provision* or strateg* or technique* or intervention* or program*).ti,ab,id. | 231240                                                                                                                                                                                                                                                                                                                 |
| 17                                                                                                                                                                                           | (environment* adj3 (autism friendly or built or condition* or adaption* or education* or enabling or learning or support*).ti,ab,id.                                                                                                                               | 36144                                                                                                                                                                                                                                                                                                                  |
| 18                                                                                                                                                                                           | ((teacher* or paraprofessional* or professional* or peer or faculty or staff) adj1 (development or education or training).ti,ab,id.                                                                                                                                | 51822                                                                                                                                                                                                                                                                                                                  |

|    |                                                                                                                                                                                                                                                              |        |
|----|--------------------------------------------------------------------------------------------------------------------------------------------------------------------------------------------------------------------------------------------------------------|--------|
| 19 | ((autis* or asperger* or childhood disintegrative or pervasive developmental) adj2 (awareness or knowledge)).ti,ab,id.                                                                                                                                       | 328    |
| 20 | (school class* or class size* or classroom* or curricul* adaptation* or group activit* or group size* or grouping or teaching assistant* or teacher aides or satellite class* or school schedul* or schoolyard* or school yard* or evidence based).ti,ab,id. | 140162 |
| 21 | or/5-19                                                                                                                                                                                                                                                      | 364082 |
| 22 | (child* or adolescen* or preadolescenc* or teen* or youth).ti,ab,id.                                                                                                                                                                                         | 836255 |
| 23 | (school* or classroom* or student*).ti,ab,id.                                                                                                                                                                                                                | 778351 |
| 24 | schools/                                                                                                                                                                                                                                                     | 28367  |
| 25 | or/23-24                                                                                                                                                                                                                                                     | 778561 |
| 26 | 22 and 25                                                                                                                                                                                                                                                    | 230828 |
| 27 | elementary schools/                                                                                                                                                                                                                                          | 7418   |
| 28 | exp colleges/                                                                                                                                                                                                                                                | 15429  |
| 29 | High Schools/                                                                                                                                                                                                                                                | 6431   |
| 30 | junior high schools/                                                                                                                                                                                                                                         | 605    |
| 31 | middle schools/                                                                                                                                                                                                                                              | 3897   |
| 32 | elementary education/                                                                                                                                                                                                                                        | 3275   |
| 33 | secondary education/                                                                                                                                                                                                                                         | 5864   |
| 34 | high school education/                                                                                                                                                                                                                                       | 3795   |
| 35 | middle school education/                                                                                                                                                                                                                                     | 695    |
| 36 | exp elementary school students/                                                                                                                                                                                                                              | 42179  |
| 37 | Middle School Students/                                                                                                                                                                                                                                      | 8009   |
| 38 | junior high school students/                                                                                                                                                                                                                                 | 11471  |
| 39 | ((elementary or compulsory or middle or primary or secondary) adj2 (school* or education or level)).ti,ab,id.                                                                                                                                                | 90341  |
| 40 | "mainstreaming (educational)"/                                                                                                                                                                                                                               | 6196   |
| 41 | ((inclusi* or integrat* or general or regular) adj2 (adolescenc* or child* or education or school* or student* or pedagogy or program or provision* or setting*)).ti,ab,id.                                                                                  | 29904  |
| 42 | (college* or high school* or public education or public school or pupil* or mainstream* or naturalistic setting*).ti,ab,id.                                                                                                                                  | 332471 |
| 43 | or/26-42                                                                                                                                                                                                                                                     | 588163 |
| 44 | 4 and 21 and 43                                                                                                                                                                                                                                              | 2680   |
