# Supplementary material for: Strategies in supporting inclusive education for autistic students—A systematic review of qualitative research results
Source: PubMed Central journal article supplement (PMC9620685; doi:10.1177/23969415221123429), 2022-09-21
Supplement: sj-pdf-3-dli-10.1177_23969415221123429.pdf [file sj-pdf-3-dli-10.1177_23969415221123429.pdf]

## Supplementary Material

### *Descriptive Characteristics of Articles Synthesized*

|    | <b>Author/Year</b>           | <b>Country</b> | <b>SEND</b> | <b>Research Focus</b>                                                                                                                                                                         |
|----|------------------------------|----------------|-------------|-----------------------------------------------------------------------------------------------------------------------------------------------------------------------------------------------|
| 1  | Able et al., 2015.           | USA            |             | The social support needs of students with ASD in fully inclusive settings, and the teachers own need to facilitate students. Furthermore, the practices that teachers found to be successful. |
| 2  | Anglim et al., 2018.         | Ireland        |             | Self-efficacy of teachers in regard to inclusion and teaching students with ASD.                                                                                                              |
| 3  | Asaro & Saddler, 2009.       | USA            |             | Intervention with a focus on self-regulated strategy development (SRSD), a method to improve writing skills.                                                                                  |
| 4  | Ashbee & Guldberg, 2018.     | Palestine      |             | Focus on concepts of inclusive education for students with ASD via a collaborative contextual enquiry method.                                                                                 |
| 5  | Ashby, 2010.                 | USA            |             | Access to academic and social experiences for pupils, evaluated through an ableism lens. Efficacy and meaningful engagement for pupils with developmental disabilities such as ASD.           |
| 6  | Barned et al., 2011.         | USA            |             | Pre-service teachers' knowledge and attitudes related inclusion of children with ASD.                                                                                                         |
| 7  | Beecher & Darragh, 2011      | USA            |             | Do exposure to literature that portrays people with ASD enhances positive dispositions in pre-service teachers.                                                                               |
| 8  | Bennett et al., 1996         | USA            |             | A collaborative case study focused on parents' views regarding successful inclusion.                                                                                                          |
| 9  | Bond & Hebron, 2016.         | UK             |             | Perceptions of professionals regarding school resource provisions.                                                                                                                            |
| 10 | Bond et al., 2017            | UK             |             | Professional development in a resource provision school, staff perspectives.                                                                                                                  |
| 11 | Bottema-Beutel et al., 2016. | USA            |             | Perceptions of youth with ASD regarding school-based, peer-mediated intervention programs.                                                                                                    |
| 12 | Bottema-Beutel et al., 2017  | USA            |             | Pupils' perspectives and reasoning with respect to including peers with ASD.                                                                                                                  |
| 13 | Bradley, 2016                | UK             |             | Evaluating a peer-mentoring program for pupils with autism in secondary school, through the perspective of pupils with autism.                                                                |
| 14 | Breivik & Hemmingsson, 2013. | Sweden         |             | Focus on how adolescents with AS experience writing in a school setting. Comparison of writing by hand vs. writing using a computerized Assistive Technology Device (ATD).                    |
| 15 | Calder et al., 2013          | UK             |             | Characteristics and perceptions of friendship in children with autism from the perspective of multiple types of informants.                                                                   |
| 16 | Carter et al., 2014          | Australia      |             | Different perspectives on regular and support class placement and factors that can contribute to or obstruct inclusive education for pupils with ASD.                                         |
| 17 | Cook et al., 2018            | UK             | Yes, partly | Experiences of learning, friendship, and bullying of girls with ASD from the perspectives of the girls and their parents.                                                                     |
| 18 | Corkum et al., 2014          | Canada         |             | Identifying professional development needs for staff working with children with ASD in an inclusive school environment.                                                                       |
| 19 | Daniel & Billingsley, 2010.  | USA            |             | Perspectives of boys with ASD on establishing and maintaining friendships.                                                                                                                    |
| 20 | Dann, 2011                   | UK             |             | Experience of the transition to secondary school (mainstream school with special provisions for ASD or regular mainstream school) from three different perspectives.                          |
| 21 | Dean et al., 2013            | USA            |             | The narratives of a girl with autism and her friends at a mainstream school.                                                                                                                  |
| 22 | Dillon et al., 2016          | UK             |             | Experiences of mainstream school from the perception of children with ASD compared with typically developed peers.                                                                            |
| 23 | Dixon & Tanner, 2013         | Australia      |             | Experiences of the transition to high school in two students, perceptions of multiple stakeholders.                                                                                           |
| 24 | Eldar et al., 2010.          | Israel         |             | Inclusion of children with ASD through the perspectives of inclusion coordinators.                                                                                                            |
| 25 | Emam & Farrell, 2009.        | UK             |             | Exploration of tensions that teachers may experience in educating students with ASD, and how these might shape support given.                                                                 |

|    |                                |              |             |                                                                                                                                                                                                                                                  |
|----|--------------------------------|--------------|-------------|--------------------------------------------------------------------------------------------------------------------------------------------------------------------------------------------------------------------------------------------------|
| 26 | Eman, 2014                     | UK           |             | Inclusion of students with ASD, examined from developmental systems perspectives such as the bio-ecological and transactional models.                                                                                                            |
| 27 | Ezzamel et al., 2017           | UK           |             | Peer-mediated intervention. Perceptions of a peer-mediated network and its impact by a pupil with ASD, peers, and staff.                                                                                                                         |
| 28 | Finch et al., 2013             | USA          |             | Perspectives on the needs of pupils with ASD in an education setting.                                                                                                                                                                            |
| 29 | Finke et al., 2009             | USA          |             | Understanding strategies that teachers use for the inclusion of children with ASD who use Augmentative Alternative Communication (ACC).                                                                                                          |
| 30 | Frederickson et al., 2010      | UK           |             | Exploring the characteristics of mainstream education placements for pupils with ASD in schools with and without an ASD resource base, through the perspective of staff members.                                                                 |
| 31 | Gentry & Lindsey, 2012         | USA          |             | An intervention including individualized fiction-reading instruction that focused on Real Reading (RR) instruction with assistive technologies (AT).                                                                                             |
| 32 | Glashan et al., 2004           | Scotland, UK | Yes, partly | Teacher experiences of support for pupils with autism.                                                                                                                                                                                           |
| 33 | Grenier & Yeaton, 2011         | UK           |             | How previewing can be a strategy for physical education.                                                                                                                                                                                         |
| 34 | Guldborg et al., 2017          | UK           | Yes, partly | Participatory research with a focus on collective enquiry through participant experiences, knowledge, and use of technology-enhanced learning. Emphasis on eliciting reflection rather than a focus on change and action.                        |
| 35 | Hay & Winn, 2005               | Australia    |             | Educational issues affecting secondary students with AS from the perspectives of general teachers, special education teachers, students with AS, and their parents.                                                                              |
| 36 | Healy, 2011                    | USA          |             | Perspectives of paraeducators regarding workplace demands.                                                                                                                                                                                       |
| 37 | Hedges et al., 2014            | USA          |             | Multiple perspectives on challenges impacting the success of students with ASD in high school.                                                                                                                                                   |
| 38 | Higginson & Chatfield, 2012.   | New Zealand  |             | ASD professional development program for teachers in schools that participated in an ASD project.                                                                                                                                                |
| 39 | Howe & Stagg, 2016             | UK           |             | Experiences of sensory issues in students with ASD.                                                                                                                                                                                              |
| 40 | Humphrey & Lewis, 2008b        | UK           |             | Views and experiences of mainstream school by pupils with AS.                                                                                                                                                                                    |
| 41 | Humphrey & Symes, 2010         | UK           |             | Views of pupils with ASD on the role of social support in determining their response to bullying. Identification of barriers to the development of social support during bullying.                                                               |
| 42 | Jindal- Snape, 2005            | Scotland, UK |             | Perceptions of professionals and parents on educational provisions, support in provisions, and what does and does not work.                                                                                                                      |
| 43 | Jones & Block, 2006            | USA          | Yes         | Successful methods and techniques used to include a student in PE class.                                                                                                                                                                         |
| 44 | Jones & Howley, 2010           | UK           | Yes         | Investigation of an interaction program (promoting inclusion) and the outcome for participating children. The impact of the program for trainees and schools, as well as the key features of this system for delivering training, were examined. |
| 45 | Kamps et al., 1998             | USA          | Yes, partly | Focus on perceptions of peers without ASD. Peers were involved in school-based integrated activities with students with autism.                                                                                                                  |
| 46 | Kasa-Hendrickson & Kluth, 2005 | USA          | Yes         | Experiences of teachers practicing inclusion and seeking strategies to provide access and opportunity to students with ASD in a general education classroom.                                                                                     |
| 47 | Keane et al., 2012             | Australia    |             | Focus on whether a satellite program achieved its goal of ongoing placement for a more inclusive educational setting. Presentation of information regarding pupils' achievements, adaptive functioning, and quality of life.                     |
| 48 | Kucharczyk et al., 2015        | USA          |             | Perspective on high school education from multiple perspectives.                                                                                                                                                                                 |
| 49 | Lamb et al., 2016              | UK           |             | Views of children with ASD on physical education.                                                                                                                                                                                                |
| 50 | Lamont, 2008                   | New Zealand  |             | Participatory action study with a focus on identifying the most effective strategies in diverse settings to increase reciprocal                                                                                                                  |

|    |                                |                     |                                                                                                                                                                                                                                                                                                                                                   |
|----|--------------------------------|---------------------|---------------------------------------------------------------------------------------------------------------------------------------------------------------------------------------------------------------------------------------------------------------------------------------------------------------------------------------------------|
|    |                                |                     | social interactions, and to identify the tools and resources that support this process.                                                                                                                                                                                                                                                           |
| 51 | Landor & Perepa, 2017          | UK                  | Case study examining whether resource bases enable social inclusion of pupils with ASD. From the perspective of different stakeholders.                                                                                                                                                                                                           |
| 52 | Lewis et al., 2005             | UK                  | Examination of whether collaborative group work using a computer could facilitate inclusion of a pupil with ASD.                                                                                                                                                                                                                                  |
| 53 | Lindsay et al., 2013           | Canada              | Teachers' perceptions of the challenges in creating an inclusive classroom environment for pupils with ASD.                                                                                                                                                                                                                                       |
| 54 | Lindsay et al., 2014           | Canada              | Teachers' perceptions of strategies for including pupils with ASD in mainstream classrooms.                                                                                                                                                                                                                                                       |
| 55 | Locke et al., 2017             | USA                 | Perspectives of school staff regarding implementing a social engagement intervention for children with autism. Areas of focus were school factors that affect the general implementation of evidence-based practices, experiences of implementing a social engagement intervention, and challenges and supports in implementing the intervention. |
| 56 | Lorenzo et al., 2013           | Spain               | Use of Immersive Virtual Reality (IVR) as a support and learning tool.                                                                                                                                                                                                                                                                            |
| 57 | McCollow et al., 2013.         | USA                 | A school district implemented a research-based model into the school system to deliver support to teachers. The model contained technical assistance teams intended to provide continuing professional development to general and special educators.                                                                                              |
| 58 | Macdonald et al., 2017         | Australia           | Participatory research regarding an intervention to improve the inclusivity of students with ASD in mainstream schools and to establish a method for evaluating program effectiveness.                                                                                                                                                            |
| 59 | Maher, 2017                    | UK                  | Para-professionals' views regarding the inclusion of students with ASD in physical education.                                                                                                                                                                                                                                                     |
| 60 | Majoko, 2016                   | Zimbabwe            | Teacher perceptions of inclusion of students with ASD in terms of challenges and supports.                                                                                                                                                                                                                                                        |
| 61 | Marks et al, 2000              | USA                 | Building portraits of adolescents with AS and their school experiences.                                                                                                                                                                                                                                                                           |
| 62 | McNerney et al., 2015.         | UK                  | Factors that directly influence secondary school choice for adolescents with autism from the perspectives of multiple informants.                                                                                                                                                                                                                 |
| 63 | McAllister & Sloan, 2016       | UK                  | Examination of an autism-friendly school environment from the perspective of adolescents with ASD.                                                                                                                                                                                                                                                |
| 64 | McAllister & Maguire, 2012a    | Northern Ireland    | Examining the ASD Classroom Design Kit in facilitating collaboration between teachers and architects.                                                                                                                                                                                                                                             |
| 65 | McAllister & Maguire, 2012b    | Northern Ireland    | Highlighting the 16 design considerations identified in the previous study.                                                                                                                                                                                                                                                                       |
| 66 | McGillicuddy & O'Donnell, 2014 | Republic of Ireland | Teacher perceptions of inclusive education for students with ASD at the post-primary level.                                                                                                                                                                                                                                                       |
| 67 | Moyse & Porter, 2015           | UK                  | How the hidden curriculum affects girls with ASD and impacts their experiences of school.                                                                                                                                                                                                                                                         |
| 68 | O'Connor, 2016                 | USA                 | Examining the use of circles of friends. Focus on changing attitudes amongst peers in relation to children with AS.                                                                                                                                                                                                                               |
| 69 | O'Hagan & Hebron, 2017         | UK                  | Friendship amongst adolescents with ASD, with a focus on the meaning and nature of friendship and factors that influence the development of friendship.                                                                                                                                                                                           |
| 70 | Oakley et al., 2013            | Australia           | How Information and Communication Technologies (ICTs) can support the creation of multimodal texts.                                                                                                                                                                                                                                               |
| 71 | Ochs et al., 2001              | USA                 | Demonstrating the social realities of inclusion in 16 students with autism.                                                                                                                                                                                                                                                                       |
| 72 | Peters, 2016                   | Hong Kong           | Participation and engagement of children with ASD during use of a Social Communication and Interaction model.                                                                                                                                                                                                                                     |
| 73 | Pfeiffer et al., 2019          | USA                 | Parent and teacher perceptions of benefits and limitations of using noise-attenuating headphones for children with ASD.                                                                                                                                                                                                                           |
| 74 | Poon et al., 2014              | Singapore           | Student perspectives of their secondary school experiences.                                                                                                                                                                                                                                                                                       |

|     |                                   |           |     |                                                                                                                                                                                                                                      |
|-----|-----------------------------------|-----------|-----|--------------------------------------------------------------------------------------------------------------------------------------------------------------------------------------------------------------------------------------|
| 75  | Poonam, 2014                      | USA       |     | Teacher experiences regarding the creation of social stories and perspectives regarding the impact of social stories on students with ASD.                                                                                           |
| 76  | Potter, 2015                      | UK        | Yes | Perspectives of a student with ASD regarding friendship.                                                                                                                                                                             |
| 77  | Ravet, 2018                       | UK        |     | Student and tutor perceptions of autism education with respect to a four-year Initial Teacher Education (ITE) program.                                                                                                               |
| 78  | Reupert et al., 2015              | Australia |     | Parent views regarding factors that enable inclusion.                                                                                                                                                                                |
| 79  | Rosetti & Goessling, 2010         | USA       |     | Strategies of paraeducators in facilitating friendship.                                                                                                                                                                              |
| 80  | Saggers et al., 2011              | Australia |     | Experiences of inclusivity in high school, from the view of students with ASD. Recognizing practices that facilitate and constrain the learning and participation.                                                                   |
| 81  | Saggers, 2015                     | Australia |     | Student perspectives on how to improve inclusivity for those with ASD in high school education.                                                                                                                                      |
| 82  | Sanahuja-Gavald et al., 2016      | Spain     |     | The inclusion process for students with ASD by focusing on support organization, collaboration, and inclusive methodologies.                                                                                                         |
| 83  | Sansosti & Sansosti, 2012         | USA       |     | Analysis of definitions and decision-making considerations regarding ASD for a school district.                                                                                                                                      |
| 84  | Santarosa & Conforto, 2016        | Brazil    | Yes | Focus on the relationship between students with ASD and mobile devices.                                                                                                                                                              |
| 85  | Sciutt et al., 2012               | USA       |     | School-related challenges and instructional practices through the perspectives of people with AS and their caregivers.                                                                                                               |
| 86  | Scheil et al., 2017               | USA       |     | Evaluation of student impressions of the Kit for Kids (KfK) program, which is a peer educational program.                                                                                                                            |
| 87  | Schultz et al., 2016              | USA       |     | Teacher perceptions of parent-professional collaboration with a focus on helpful parental involvement and advocacy strategies to guarantee the success of students in inclusive settings.                                            |
| 88  | Smith et al., 2017                | USA       |     | Participatory research with the goal of developing and evaluating interventions for children with autism.                                                                                                                            |
| 89  | Sonnenmeier et al., 2005          | USA       | Yes | Implementation of a team-support-planning model (Beyond Access Model) for a student with autism.                                                                                                                                     |
| 90  | Soto-Chodiman et al., 2012        | Australia |     | Experiences of teachers who have had a student with ASD in their classroom.                                                                                                                                                          |
| 91  | Starr & Foy, 2010                 | Canada    |     | Parent perspectives regarding the education of their child with ASD.                                                                                                                                                                 |
| 92  | Starr et al., 2016                | Canada    |     | Perceptions of parents, teachers, and early intervention service providers regarding the transition to kindergarten for children with ASD.                                                                                           |
| 93  | Stokes et al., 2017               | Australia |     | Teaching strategies found to be successful by teachers and principals for their students with High functioning ASD.                                                                                                                  |
| 94  | Symes & Humphrey, 2011a           | UK        |     | Perceptions of Teacher's Assistants (TAs) regarding aspects of school culture that contribute to the development of inclusion.                                                                                                       |
| 95  | Symes & Humphrey, 2011b           | UK        |     | Examination of how TAs support students, perceive effects of professional training, and view their relationships with teachers. Identification of factors that facilitate or constrain their practice.                               |
| 96  | Symes & Humphrey, 2012            | UK        |     | Examination of whether students with ASD were effectively included in lessons, compared with students with dyslexia or those with no Special Educational Needs, and an examination of how the presence of a TA influences inclusion. |
| 97  | Taneja Johansson, 2014            | India     |     | Awareness of autism in stakeholders and their perspectives on children with autism.                                                                                                                                                  |
| 98  | Teixeira De Matos & Morgado, 2016 | Portugal  |     | Examination of how participation transpires in students with ASD in mainstream school.                                                                                                                                               |
| 99  | Tissot, 2011                      | UK        | Yes | Views of parents and local authorities regarding how they perceive and experience the process of shaping educational provisions for students with ASD.                                                                               |
| 100 | Tobias, 2009                      | UK        |     | Additional support at secondary school, as perceived by students with ASD and their parents.                                                                                                                                         |
| 101 | Tso & Strnadová, 2017             | Australia |     | Experiences of parents of students with ASD in regard to the transition to high school and the collaboration between support at home and at school.                                                                                  |

|     |                           |             |                                                                                                                                                                                                        |
|-----|---------------------------|-------------|--------------------------------------------------------------------------------------------------------------------------------------------------------------------------------------------------------|
| 102 | Turnbull et al., 2002     | USA         | Implementation of positive behavior support (PBS) on universal, group, and individual support levels, with a focus on one student.                                                                     |
| 103 | Wastney et al., 2007      | New Zealand | To facilitate acceptance and understanding amongst peers regarding autism, parents explained their child's challenges and strengths to his new classmates.                                             |
| 104 | Whalon & Hart, 2011       | USA         | Experience reading instructions in children with ASD.                                                                                                                                                  |
| 105 | Wong, 2018                | Hong Kong   | Self-portrayals of 17 adolescents, who reveal challenges they have encountered.                                                                                                                        |
| 106 | Woodfield & Ashby, 2016   | USA         | Experiences of high school students who type to communicate and the support systems around them.                                                                                                       |
| 107 | Young et al., 2017        | Ireland     | Examination of teachers' attitudes regarding inclusion, initial teacher education, professional development opportunities, and their experiences working with students with ASD in inclusive settings. |
| 108 | Young-Pelton & Doty, 2013 | USA         | Evaluating the Montana Autism Education Project (MAEP) with a focus on increasing knowledge regarding educational practices for students with ASD.                                                     |

---
